# Supplementary material
Source: MDPI journal article supplement (https://www.mdpi.com/2071-1050/14/24/17000)
Supplement: s1 [file s1]

## Supplementary materials

### Error Percentage for Stripping Experiments

**Table S1.** Experimental data points performed in replicates, average ammonia recovery and standard deviation.

| S. No | Stripping Gas Composition                | Final Ammonia Recovery (%) | Standard Deviation | Process Conditions                              |
|-------|------------------------------------------|----------------------------|--------------------|-------------------------------------------------|
| 1     | 100% air                                 | 93.86                      | 2.16               | Temperature (°C) = 57<br>pH = 9.5<br>G/L = 1500 |
| 2     | 80% N <sub>2</sub> -20% CO <sub>2</sub>  | 63.42                      | 4.41               |                                                 |
| 3     | 60% CH <sub>4</sub> -40% CO <sub>2</sub> | 53.18                      | 2.72               |                                                 |

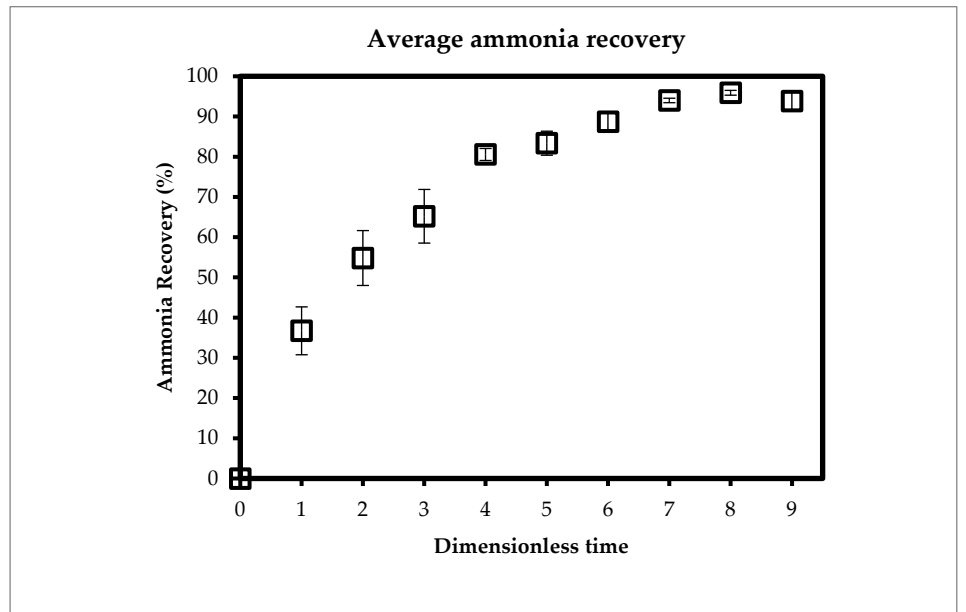

**Figure S1.** Ammonia recovery averaged over three trials using air (0% CO<sub>2</sub>) as the stripping gas.

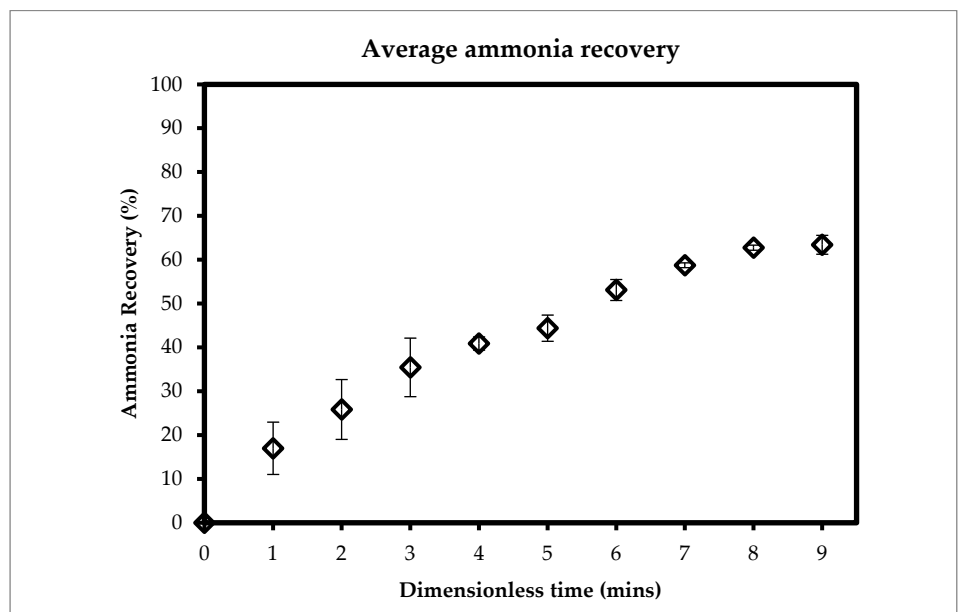

**Figure S2.** Ammonia recovery averaged over three trials using 80% N<sub>2</sub>-20% CO<sub>2</sub> as stripping gas.

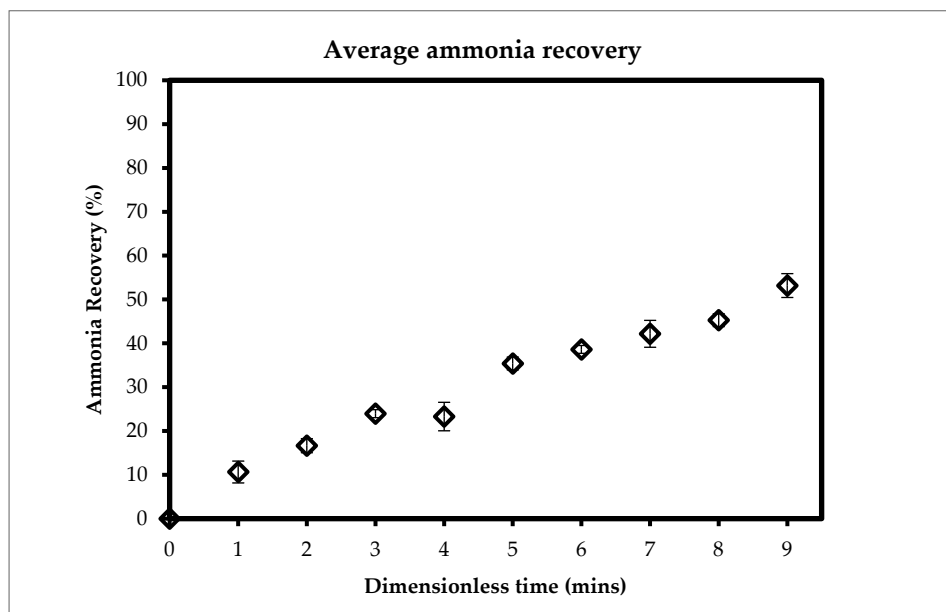

**Figure S3.** Ammonia recovery averaged over three trials using 60% CH<sub>4</sub>- 40% CO<sub>2</sub> as the stripping gas.

**Table S2.** ANOVA for DoE. '\*' represents the multiplication of two terms

| Parameter          | Adjusted SS | F-Value | p-Value |
|--------------------|-------------|---------|---------|
| Model              | 5100        | 8.09    | 0.263   |
| Linear             | 4734        | 15.01   | 0.187   |
| Temperature        | 4371        | 41.58   | 0.098   |
| pH                 | 210         | 2       | 0.392   |
| G/L                | 153         | 1.46    | 0.44    |
| 2-way interactions | 366         | 1.16    | 0.578   |
| Temperature * pH   | 300         | 2.85    | 0.34    |
| pH * G/L           | 21          | 0.2     | 0.732   |
| Temperature * G/L  | 45          | 0.43    | 0.631   |
